# Supplementary material
Source: PubMed Central journal article supplement (PMC1176424)

**Water uptake and distribution in germinating tobacco seeds investigated *in vivo* by nuclear magnetic resonance imaging (MRI)<sup>1,[w]</sup>**

**Bertram Manz, Kerstin Müller, Birgit Kucera, Frank Volke, Gerhard Leubner-Metzger\***

Institut für Biologie II, Botanik/Pflanzenphysiologie, Albert-Ludwigs-Universität Freiburg, Schänzlestr. 1, D-79104 Freiburg i. Br., Germany, Web "The Seed Biology Place" <http://www.seedbiology.de> (K.M., B.K., G.L.-M.); Fraunhofer-Institut für Biomedizinische Technik (IBMT), Arbeitsgruppe Magnetische Resonanz, Ensheimer Str. 48, D-66386 St. Ingbert, Germany, Web: <http://www.nmr.fraunhofer.de> (B.M., F.V.)

\* Corresponding author; e-mail [gerhard.leubner@biologie.uni-freiburg.de](mailto:gerhard.leubner@biologie.uni-freiburg.de); fax + 49-761-203-2612; phone + 49-761-203-2936

<sup>1</sup> This work was supported by grants to G.L.-M. from the Wissenschaftliche Gesellschaft Freiburg and the Deutsche Forschungsgemeinschaft (DFG LE 720/3), which are gratefully acknowledged.

<sup>[w]</sup> The online version of this article contains Web-only data. The **supplemental** material is available at <http://www.plantphysiol.org>

**PLANT PHYSIOLOGY 2005**

**Supplementary Figure 1 of manuscript PLANTPHYSIOL/2005/061663**

**Running head:** NMR microimaging of tobacco seeds

**Revised Manuscript - Resubmission Date:** April 14, 2005

**Original Manuscript - Decision Date:** March 23, 2005

**Journal research area - Editor:** Ecophysiology and Whole Plant – Ruth Finkelstein

**Supplementary Figure 1.** Non-invasive *in vivo* NMR microimaging analyses of the effect of  $\beta$ Glu I over-expression on water uptake and distribution during tobacco seed germination in medium with 10  $\mu$ M ABA. The spatial distribution of water within the seed tissues is visualized by false colors (relative scales from "0" (black) to maximum signal strength "max" (white)). A scale bar is given as a size marker. The NMR microimages were obtained with ca. 30  $\mu$ m resolution. **(A,B)** Each of the panels shows two-dimensional slices from full 3D NMR microimages as serial sections through three single seeds (one per row) at the given stage that corresponds to a time window presented in Fig. 6A as grey box (80-110 h). *Upper two rows of each panel:* The serial microimages correspond to longitudinal sections with the orientation: radicle at the bottom, shoot at the top. *Lower row of each panel:* The serial microimages correspond more or less to transverse sections. **(A)** TKSG7 ( $\beta$ Glu I over-expressing) seeds. **(B)** TCIB1 ("empty-vector control") seeds. Small white arrows indicate the micropylar endosperm (A,B). **(C, D)** Enlarged view of selected NMR microimages of TKSG7 (C) and TCIB1 (D) corresponding to slices presented in (A) and (B), respectively. The small numbers designate the corresponding slices.

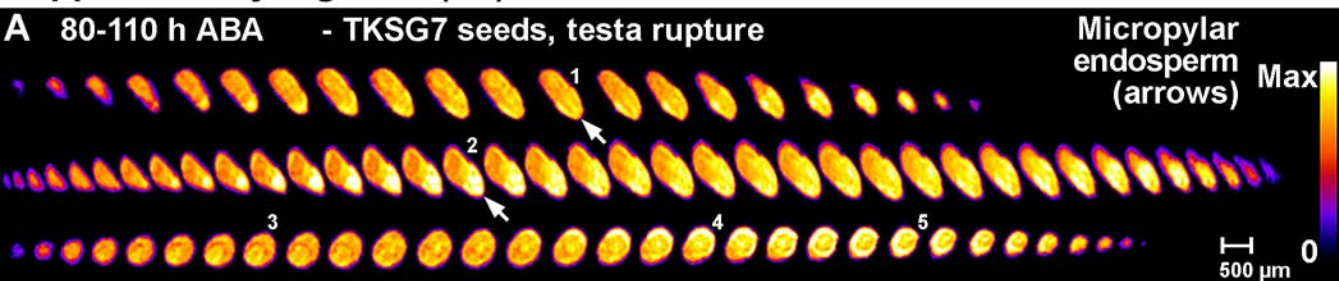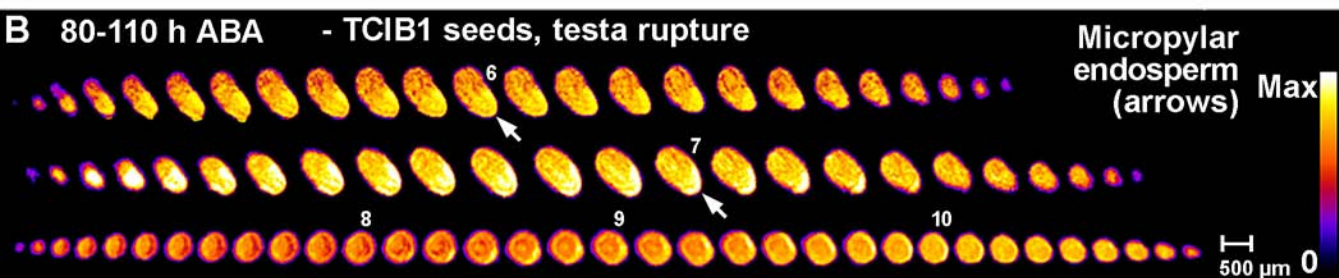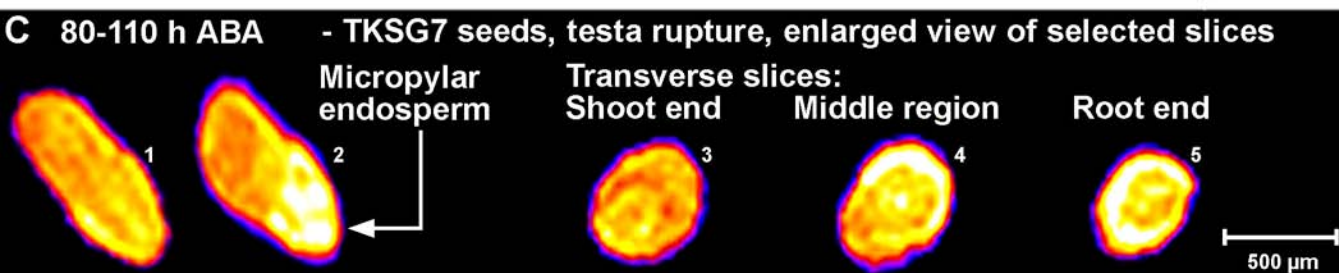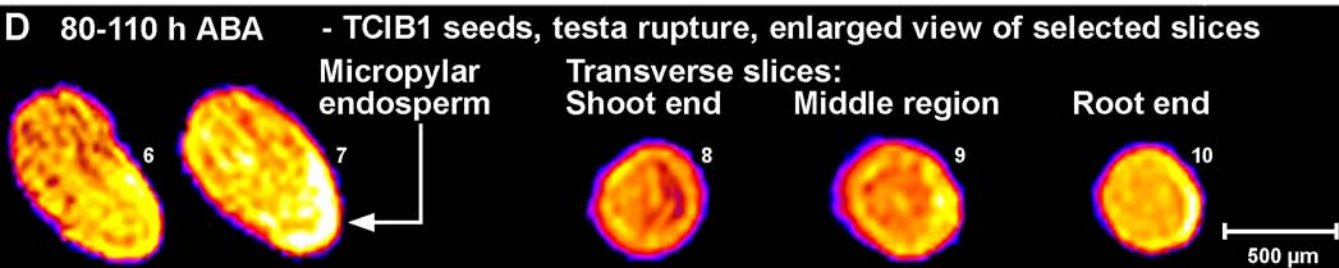

Supplement: plntphys_pp.105.061663_1.pdf [file plntphys_pp.105.061663_1.pdf]
